# Supplementary material for: Evaluation of carbohydrate-deficient transferrin measurements on the V8 capillary electrophoresis system and comparison with the IFCC approved HPLC reference method and N-Latex immunonephelometric assay
Source: publisher site journal article supplement (doi:10.1515/cclm-2020-0545), 2020-10-13
Supplement: Supplementary file 1 [file j_cclm-2020-0545_suppl.docx]

**Supplemental table 1: results found in the nine excluded samples with each of the CDT assays.**

| **Excluded sample** | **CDT N-Latex, %** | **HPLC, disialo, %** | **V8-CE, disialo, %** |
| --- | --- | --- | --- |
| 1 | 1.1 | transferrin variant | transferrin variant |
| 2 | 1.1 | transferrin variant | transferrin variant |
| 3 | 1.6 | 1.57 | aberrant curve, possible Trf variant |
| 4 | 2.0 | 1.91 | 0.5, aberrant curve |
| 5 | 2.0 | 3.01 di-tri bridging | aberrant curve, icteric sample |
| 6 | 1.8 | 2.29 di-tri bridging | 0.07 |
| 7 | 2.7 | 2.68 di-tri bridging | Icteric, no result |
| 8 | 3.0 | 2.26 | aberrant curve, icteric sample |
| 9 | 10.3 | 14.08 | aberrant curve |
